# Supplementary material for: Silver(i)-based energetic coordination polymers: synthesis, structure and energy performance
Source: Royal Society of Chemistry journal article supplement (doi:10.1039/c5nj01623a), 2015-01-01
Supplement: c5nj01623a1.pdf [file c5nj01623a1.pdf]

## Supporting Information

### Silver(I)-based Energetic Coordination Polymers: Synthesis, Structure and Energy Performance

Xiaoni Qu, Sheng Zhang, Qi Yang, Zhiyong Su, Qing Wei,\* Gang Xie, Sanping Chen\*

*<sup>a</sup> Key Laboratory of Synthetic and Natural Functional Molecule Chemistry of Ministry of Education, College of Chemistry and Materials Science, Northwest University, Xi'an 710069, China.*

Table of Contents:

**Table S1.** Selected bond lengths (Å) and bond angles (°) for **1**.

**Table S2.** Selected bond lengths (Å) and bond angles (°) for **2**.

**Figure S1.** XRPD curves for compounds **1** and **1a**.

**Figure S2.** XRPD curves for compounds **2** and **2a**.

**Figure S3.** The  $\pi$ - $\pi$  overlap interactions between triazole rings in the adjacent layers in **1(a)** and **2(b)**.

**Figure S4.** The experimental luminescence decay of the free Hatz ligand monitored at excitation/emission 340/503 nm.

**Figure S5.** The experimental luminescence decay of the compound **1** monitored at excitation/emission 340/497 nm.

**Figure S6.** The experimental luminescence decay of the free Hntz ligand monitored at excitation/emission 384/495 nm.

**Figure S7.** The experimental luminescence decay of the compound **2** monitored at excitation/emission 384/503 nm.

**\*Corresponding author**

**Prof. Sanping Chen**

**Tel.: +8602988302604**

Fax: +8602988302604

E-mail: [sanpingchen@126.com](mailto:sanpingchen@126.com)

**Table S1.** Selected bond lengths (Å) and bond angles (°) for **1**.

---

|                     |            |                   |            |
|---------------------|------------|-------------------|------------|
| Ag(1)-N(3)#1        | 2.212(3)   | N(2)-Ag(1)-N(1)#2 | 108.07(13) |
| Ag(1)-N(2)          | 2.267(4)   | C(2)-N(2)-Ag(1)   | 127.4(3)   |
| Ag(1)-N(1)#2        | 2.269(4)   | N(1)-N(2)-Ag(1)   | 126.3(3)   |
| N(1)-Ag(1)#2        | 2.269(4)   | C(1)-N(1)-Ag(1)#2 | 127.0(3)   |
| N(3)-Ag(1)#3        | 2.212(3)   | N(2)-N(1)-Ag(1)#2 | 123.3(3)   |
| N(3)#1-Ag(1)-N(2)   | 125.06(13) | C(1)-N(3)-Ag(1)#3 | 126.0(3)   |
| N(3)#1-Ag(1)-N(1)#2 | 126.86(13) | C(2)-N(3)-Ag(1)#3 | 127.7(3)   |

---

Symmetry transformations used to generate equivalent atoms:

#1  $x+1/2, -y+1/2, z+1/2$ ; #2  $-x+2, -y, -z+2$ ; #3  $x-1/2, -y+1/2, z-1/2$ .

---

**Table S2.** Selected bond lengths (Å) and bond angles (°) for **2**.

---

|                   |          |                     |            |
|-------------------|----------|---------------------|------------|
| N(4)-Ag(1)#1      | 2.258(3) | C(4)-N(3)-Ag(1)#2   | 129.6(2)   |
| N(3)-Ag(1)#2      | 2.261(3) | C(3)-N(3)-Ag(1)#2   | 129.3(2)   |
| Ag(1)-N(4)#1      | 2.258(3) | N(4)#1-Ag(1)-N(3)#3 | 124.81(10) |
| Ag(1)-N(3)#3      | 2.261(3) | N(4)#1-Ag(1)-N(2)   | 106.86(9)  |
| Ag(1)-N(2)        | 2.307(3) | N(3)#3-Ag(1)-N(2)   | 126.87(10) |
| C(3)-N(4)-Ag(1)#1 | 126.9(2) | C(4)-N(2)-Ag(1)     | 128.4(2)   |
| N(2)-N(4)-Ag(1)#1 | 127.3(2) | N(4)-N(2)-Ag(1)     | 123.9(2)   |

---

Symmetry transformations used to generate equivalent atoms:

#1  $-x+1, -y+2, -z+1$ ; #2  $x, -y+3/2, z+1/2$ ; #3  $x, -y+3/2, z-1/2$ .

---

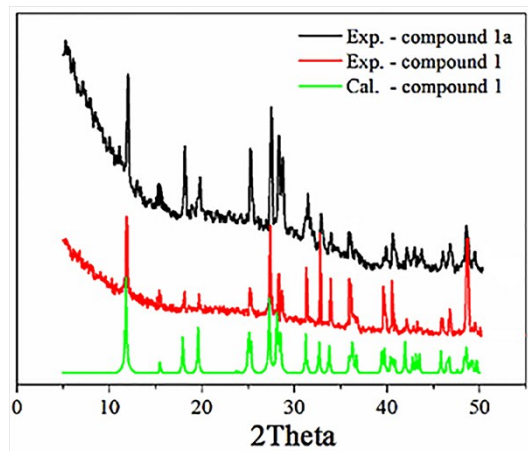

**Figure S1.** XRPD curves for compounds **1** and **1a**.

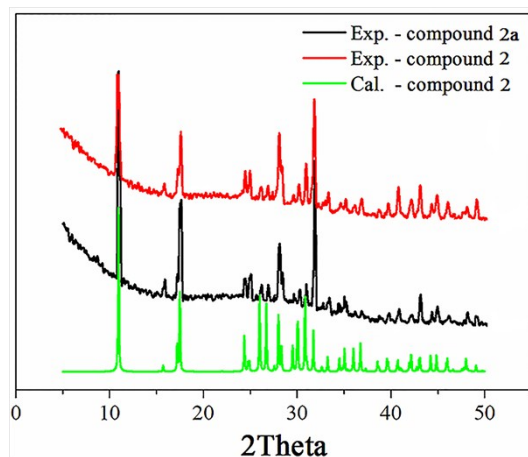

**Figure S2.** XRPD curves for compounds **2** and **2a**.

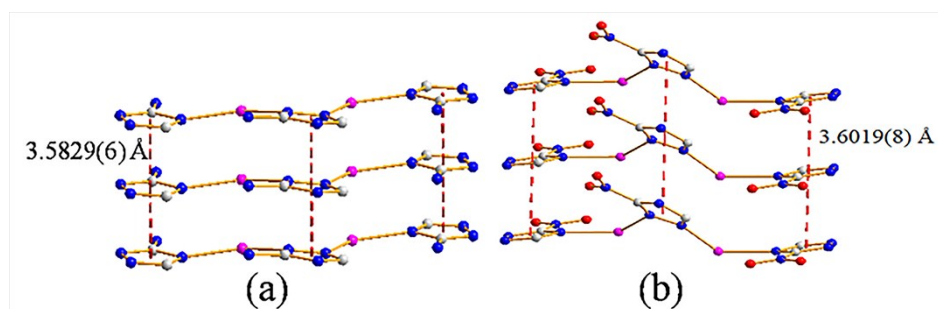

**Figure S3.** The  $\pi$ - $\pi$  overlap interactions between triazole rings in the adjacent layers in **1** (a) and **2** (b).

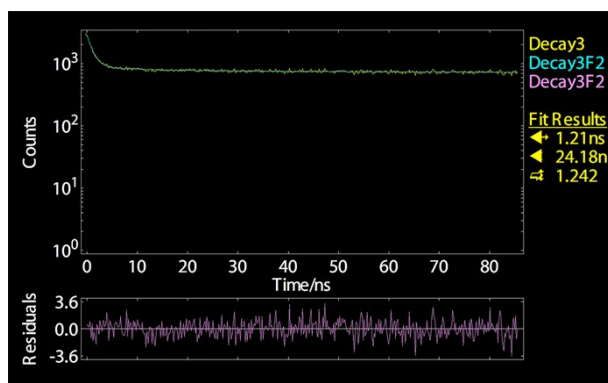

**Figure S4.** The experimental luminescence decay of the free Hatz ligand monitored at excitation/emission 340/503 nm.

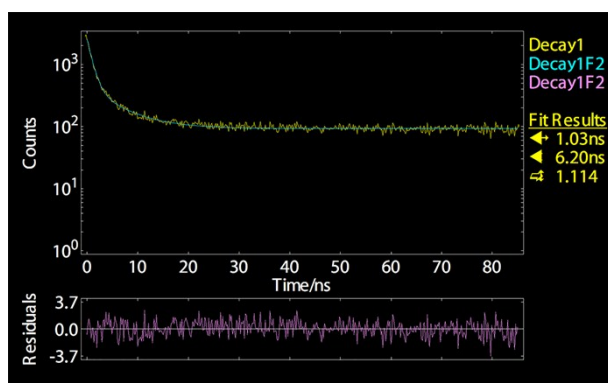

**Figure S5.** The experimental luminescence decay of the compound **1** monitored at excitation/emission 340/497 nm.

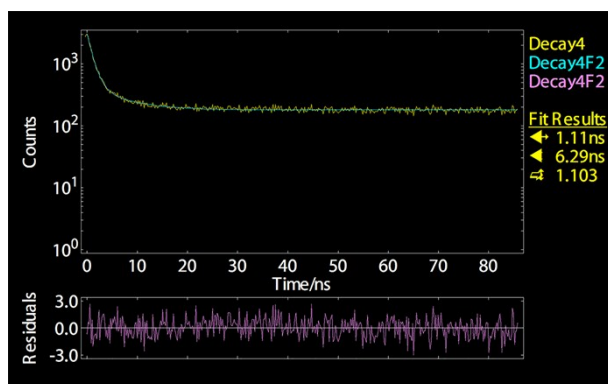

**Figure S6.** The experimental luminescence decay of the free Hntz ligand monitored at excitation/emission 384/495 nm.

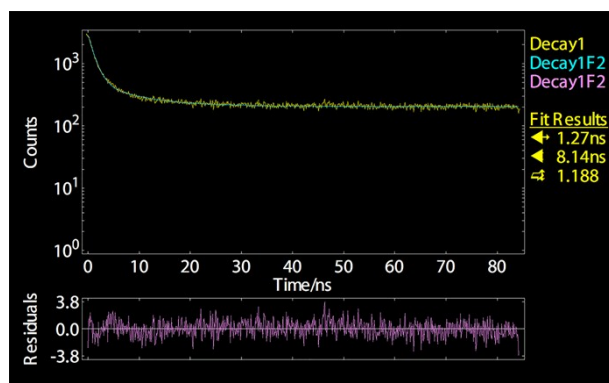

**Figure S7.** The experimental luminescence decay of the compound **2** monitored at excitation/emission 384/503 nm.
